# Supplementary material for: From Polygenic Scores to Precision Medicine in Alzheimer’s Disease: A Systematic Review
Source: PubMed Central journal article supplement (PMC7242840; doi:10.3233/jad-191233), 2020-04-21
Supplement: jad-74-jad191233-s001.pdf [file jad-74-jad191233-s001.pdf]

# Supplementary Material

## From Polygenic Scores to Precision Medicine in Alzheimer's Disease: A Systematic Review

**Supplementary Table 1.** Search strategy terms used for searching Embase, Medline via Ovid and PsychINFO.

| Key word                                                                                                                                             |
|------------------------------------------------------------------------------------------------------------------------------------------------------|
| 1. Polygenic risk score.mp                                                                                                                           |
| 2. Risk profile score.mp                                                                                                                             |
| 3. Polygenic variation.mp                                                                                                                            |
| 4. Genome-wide association study/                                                                                                                    |
| 5. GWAS.mp                                                                                                                                           |
| 6. Gene score.mp                                                                                                                                     |
| 7. Genetic score.mp                                                                                                                                  |
| 8. Allele score.mp                                                                                                                                   |
| 9. Polygenic.mp                                                                                                                                      |
| 10. exp Polymorphism, single nucleotide/                                                                                                             |
| 11. SNP score.mp                                                                                                                                     |
| 12. or/1-10                                                                                                                                          |
| 13. exp Alzheimer disease/                                                                                                                           |
| 14. Alzheimer*.mp                                                                                                                                    |
| 15. or/13-14                                                                                                                                         |
| 16. 12 and 15                                                                                                                                        |
| 17. limit 16 to: <ul style="list-style-type: none"><li>- English language</li><li>- Humans</li><li>- Yr= "2009-3<sup>rd</sup> August 2018"</li></ul> |

GWAS, genome wide association studies; SNP, single nucleotide polymorphism

**Supplementary Table 2.** List of data extracted from all studies.

| <b>Details</b>                         |
|----------------------------------------|
| • Author                               |
| • Year                                 |
| • Discovery sample                     |
| • Target sample                        |
| • Outcome measure(s)                   |
| • N                                    |
| • p value thresholds                   |
| • Phenotypes/correlates                |
| • $\beta$ , odds ratio or hazard ratio |
| • Confidence intervals                 |
| • p                                    |
| • R2 (%)                               |

**Supplementary Table 3.** Studies examining associations with threshold-based PRS, principle results. (Excel file)

**Supplementary Table 4.** Studies examining associations with Bonferroni-significant SNP PRS, principle results. (Excel file)
